# Supplementary material for: Ferroptosis involves in Schwann cell death in diabetic peripheral neuropathy
Source: PubMed Central journal article supplement (PMC10566555; doi:10.1515/med-2023-0809), 2023-10-09
Supplement: med-2023-0809-sm.pdf [file med-2023-0809-sm.pdf]

# Supplementary material

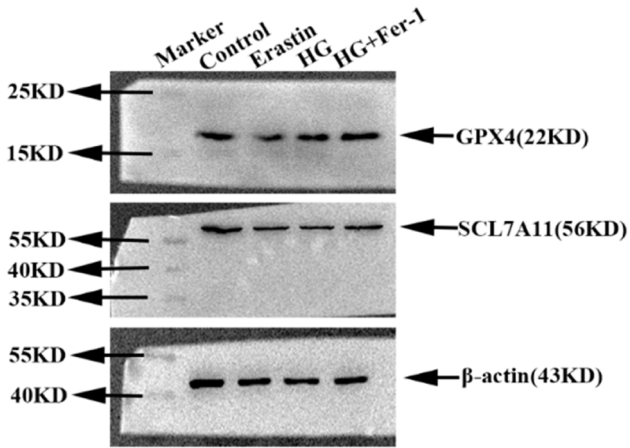

Figure S1: Original image of WB in Figure 2b.

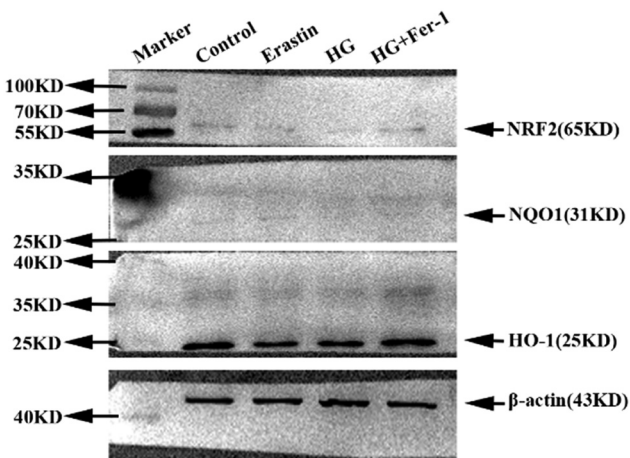

Figure S2: Original image of WB in Figure 3a.

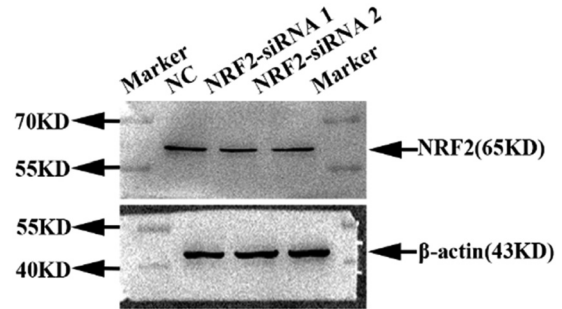

Figure S3: Original image of WB in Figure 3c.

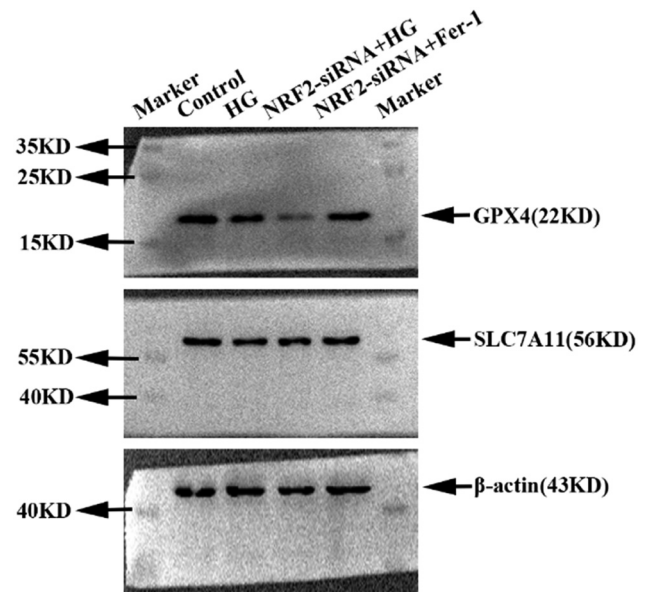

Figure S4: Original image of WB in Figure 3g.
